# Supplementary material for: A quantitative atlas of polyadenylation in five mammals
Source: HighWire-hosted journal article supplement (doi:10.1101/gr.132563.111), 2012-03-27
Supplement: Derti_REVSUPPFile1.pdf [file Derti_REVSUPPFile1.pdf]

## polyA-seq

The following is a method for amplification of 3' ends of transcripts anchored at the poly-A tail. It is a modified form of NSR where 1<sup>st</sup> strand is done using a T10VN primer, and 2<sup>nd</sup> strand using the standard NSR-AS primer pool. Sequencing is carried out using a primer ending in 10 Ts to initiate read directly at 3'end.

### Primers

1<sup>st</sup> strand cDNA synthesis: NSR with short 5' PCR annealing site (100 nM)

**TB1003**      **ACACGTCGCG**TTTTTTTTTTVN

2<sup>nd</sup> strand synthesis: N7 with short 5' PCR annealing site (10 uM):

**TB-rev (GA)** **TCCGATCTGA**NNNNNNNN (ends in 7 Ns)

PCR: annealing sites with 5' extensions for sequencing the antisense strand (10 uM):

**TB1007**      AATGATACGGCGACCACCGAGC**ACGCTGTCCCGACACGTCGCG**  
**TB1002**      CAAGCAGAAGACGGCATACGAGCTCT**TCCGATCTGA**

Sequencing primer (100 uM):

**TB1005**      **GCACGCTGTCCCGACACGTCGCG**TTTTTTTTTT

### 1<sup>st</sup> strand Synthesis Reaction (Invitrogen)

Mix the following in PCR strip cap tube:

x ul      polyA+ RNA (100 ng: can go down to 50 if mRNA is limiting, 100 is best)  
2.0 ul      **TB1003** primer (**0.1 uM**)

To 11.4 ul    water

Heat to 65°C for 10 min and snap-chill at 4°C (use separate cyclers @ 4°C).

Add 8.4 ul of RT cocktail and mix:

4.0 ul      5X buffer (Invitrogen)  
1.6 ul      dNTPs (25 mM)  
1.0 ul      DTT  
1.0 ul      RNase OUT (Invitrogen)  
1.0 ul      Superscript III Reverse Transcriptase (Invitrogen)

Incubate at 40°C for 90 min, 70°C for 15 min and then cool to 4°C.

Add 1 ul RNase H (Invitrogen) and mix

Incubate at 37°C for 20 min, 75°C for 15min and then cool to 4°C.

### **1<sup>st</sup> Qiagen purification – all spins @ 13k**

Add 79 uL water and mix. Add 500 uL buffer PB and pass over qiaquick (13k – 1'). Wash with 750 uL wash buffer. Dry (spin 2'). Elute twice with 55°C, 30 uL water (let sit for 1 minute prior to each spin).

### **2<sup>nd</sup> Strand Synthesis Reaction (New England Biolabs)**

Add 40 uL of 2<sup>nd</sup> strand mix (below) to the 1<sup>st</sup> strand product (60 uL from above):

|         |                                                              |
|---------|--------------------------------------------------------------|
| 11.7 ul | water                                                        |
| 10.0 ul | 10X NEBuffer 2                                               |
| 10.0 ul | <b>TB-rev (GA) – 10 uM</b>                                   |
| 5.0 ul  | 10 mM dNTPs                                                  |
| 3.3 ul  | Klenow enzyme (5U/ul of NEB exo <sup>-</sup> Klenow #M0212L) |

Incubate at 37°C for 30 min.

### **Ampure XP-Purification**

Add 1.8 volumes of Agencourt AMPure XP beads (Beckman Coulter) for 5 minutes, washing twice with 70% EtOH and eluting with 50 µL of elution buffer.

### **PCR (Roche – 50 uL)**

Add 31 ul of purified 2<sup>nd</sup> Strand Synthesis product to 18 uL of PCR mix:

|        |                                            |
|--------|--------------------------------------------|
| 10 uL  | 10X Buffer (Roche reagent #2)              |
| 2.5 uL | 99.9% DMSO (for 5% final concentration)    |
| 1 uL   | 10 mM dNTP                                 |
| 2 uL   | 10 uM <b>TB1007</b> primer                 |
| 2 uL   | 10 uM <b>TB1002</b> primer                 |
| 1 uL   | 25 mM MgCl <sub>2</sub> (Roche reagent #4) |

To each tube separately (@ 4°C), add and mix by pipetting up-down):

|        |                     |
|--------|---------------------|
| 0.5 uL | Roche HF Enzyme Mix |
|--------|---------------------|

Amplify using the following cycling routine in an ABI 2700:

94 C for 2 min

2 cycles of:

94 C for 10 sec

40 C for 2 min

72 C for 1 min

8 cycles of:

94 C for 10 sec

60 C for 30 sec

72 C for 1 min

20 cycles of:

94C for 15 sec

60 C for 30 sec

72 C for 1 min + 10 sec ☺ (use AutoX to add 10 sec/cycle)

72 C - 5 min to polish ends

4 C hold

**Post PCR clean-up -> Perform second Ampure purification as described above**

**Post PCR Analysis:**

1. run PCR reaction out on gel, should see band ranging from ~80-250 nt
2. Nanodrop spec.

**Sequencing:**

Standard Illumina setup, but use **TB1005** as sequencing primer.
